# Supplementary material for: Photothermal Conversion of W18O49 with a Tunable Oxidation State
Source: PubMed Central journal article supplement — ChemistryOpen. 2017 Jan 18;6(2):261–5. doi: 10.1002/open.201600149 (PMC5390804; doi:10.1002/open.201600149), 2017-01-18
Supplement: OPEN-6-261-s001.pdf [file OPEN-6-261-s001.pdf]

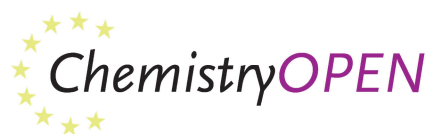

## Supporting Information

© 2017 The Authors. Published by Wiley-VCH Verlag GmbH & Co. KGaA, Weinheim

### **Photothermal Conversion of $W_{18}O_{49}$ with a Tunable Oxidation State**

Zhenxing Fang, Shihui Jiao, Yutang Kang, Guangsheng Pang,\* and Shouhua Feng<sup>[a]</sup>

open\_201600149\_sm\_miscellaneous\_information.pdf

## Supporting Information

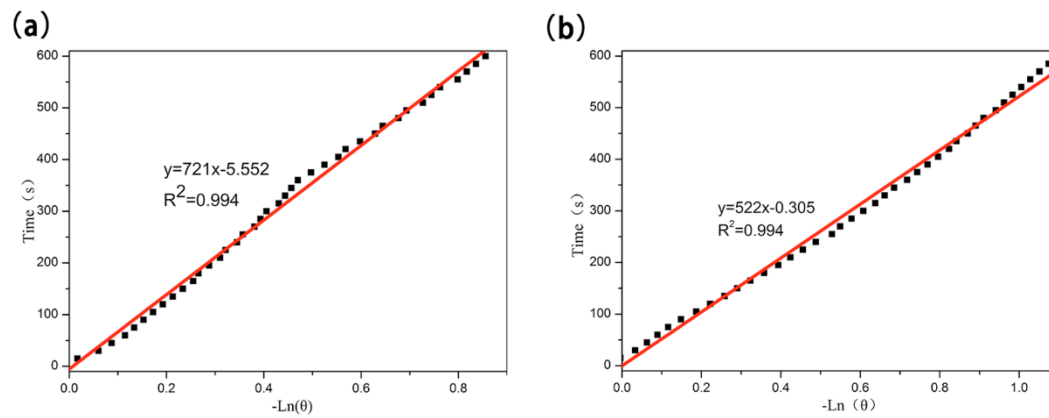

Figure S1. (a) Time constant for heat transfer from system is calculated to be 721 s for  $o\text{-W}_{18}\text{O}_{49}$ .  
(b) Time constant for heat transfer from system is calculated to be 522 s for  $n\text{-W}_{18}\text{O}_{49}$ .
